# Supplementary material for: Genomic variations leading to alterations in cell morphology of Campylobacter spp
Source: PubMed Central journal article supplement (PMC5133587; doi:10.1038/srep38303), 2016-12-02
Supplement: srep38303-s2.pdf [file srep38303-s2.pdf]

1 **ADDITIONAL INFORMATION**

2

3 **Genomic variations leading to alterations in cell morphology of *Campylobacter***

4 **spp.**

5

6 **Running head:** Genome changes causing *Campylobacter* shape change

7

8 Diane Esson<sup>1</sup>, Alison E Mather<sup>2a</sup>, Eoin Scanlan<sup>1b</sup>, Srishti Gupta<sup>1</sup>, Stefan PW de Vries<sup>1</sup>,  
9 David Bailey<sup>3</sup>, Simon R Harris<sup>2</sup>, Trevelyan J McKinley<sup>1c</sup>, Guillaume Méric<sup>4</sup>, Sophia K  
10 Berry<sup>1</sup>, Pietro Mastroeni<sup>1</sup>, Samuel K Sheppard<sup>4</sup>, Graham Christie<sup>3</sup>, Nicholas R  
11 Thomson<sup>2,5</sup>, Julian Parkhill<sup>2</sup>, Duncan J Maskell<sup>1</sup>, Andrew J Grant<sup>1\*</sup>

12

13 <sup>1</sup>Department of Veterinary Medicine, University of Cambridge, Madingley Road,  
14 Cambridge, UK.

15 <sup>2</sup>Wellcome Trust Sanger Institute, Wellcome Trust Genome Campus, Hinxton,  
16 Cambridge, UK.

17 <sup>3</sup>Department of Chemical Engineering and Biotechnology, University of Cambridge,  
18 New Museums Site, Pembroke Street, Cambridge, UK.

19 <sup>4</sup>The Milner Centre for Evolution, Department of Biology and Biotechnology, University  
20 of Bath, Claverton Down, Bath, UK.

21 <sup>5</sup>The London School of Hygiene and Tropical Medicine, London, UK.

22 <sup>a</sup>Current address: Department of Veterinary Medicine, University of Cambridge,  
23 Madingley Road, Cambridge, UK.

24 <sup>b</sup>Current address: San Francisco Veterans Affairs Medical Center and the University  
25 of California, San Francisco, USA.

26 °Current address: College of Engineering, Mathematics and Physical Sciences,  
27 University of Exeter, Treliever Road, Penryn, Cornwall, UK.

28

29 \*To whom correspondence should be addressed: [aig60@cam.ac.uk](mailto:aig60@cam.ac.uk)

30

31

32

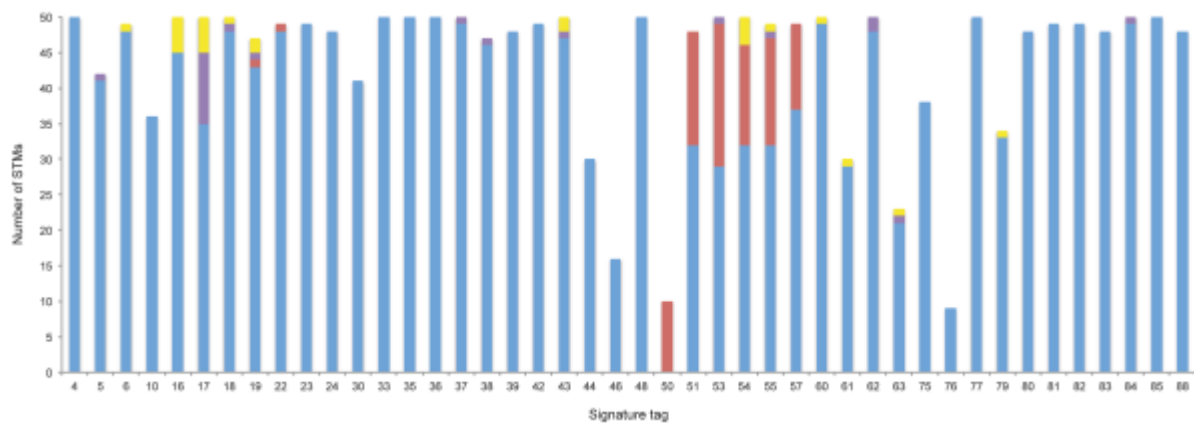

33

34 **Figure S1** Distribution of observed morphologies within the *C. jejuni* M1 STM Tn  
35 mutant library. *C. jejuni* M1 Tn mutants screened by light microscopy are grouped by  
36 signature tag. Each signature tag column is colour-coded by the number of Tn mutants  
37 of each morphology: helical (blue), rod (red), rod-and-helical (purple) and short helical  
38 (yellow). Some non-helical morphologies appear to cluster within select signature tags  
39 of the library. Notably, many rod-shaped Tn mutants are from signature tags 50, 51,  
40 53, 54, 55 and 57 and many rod-and-helical Tn mutants are from signature tag 17.

41

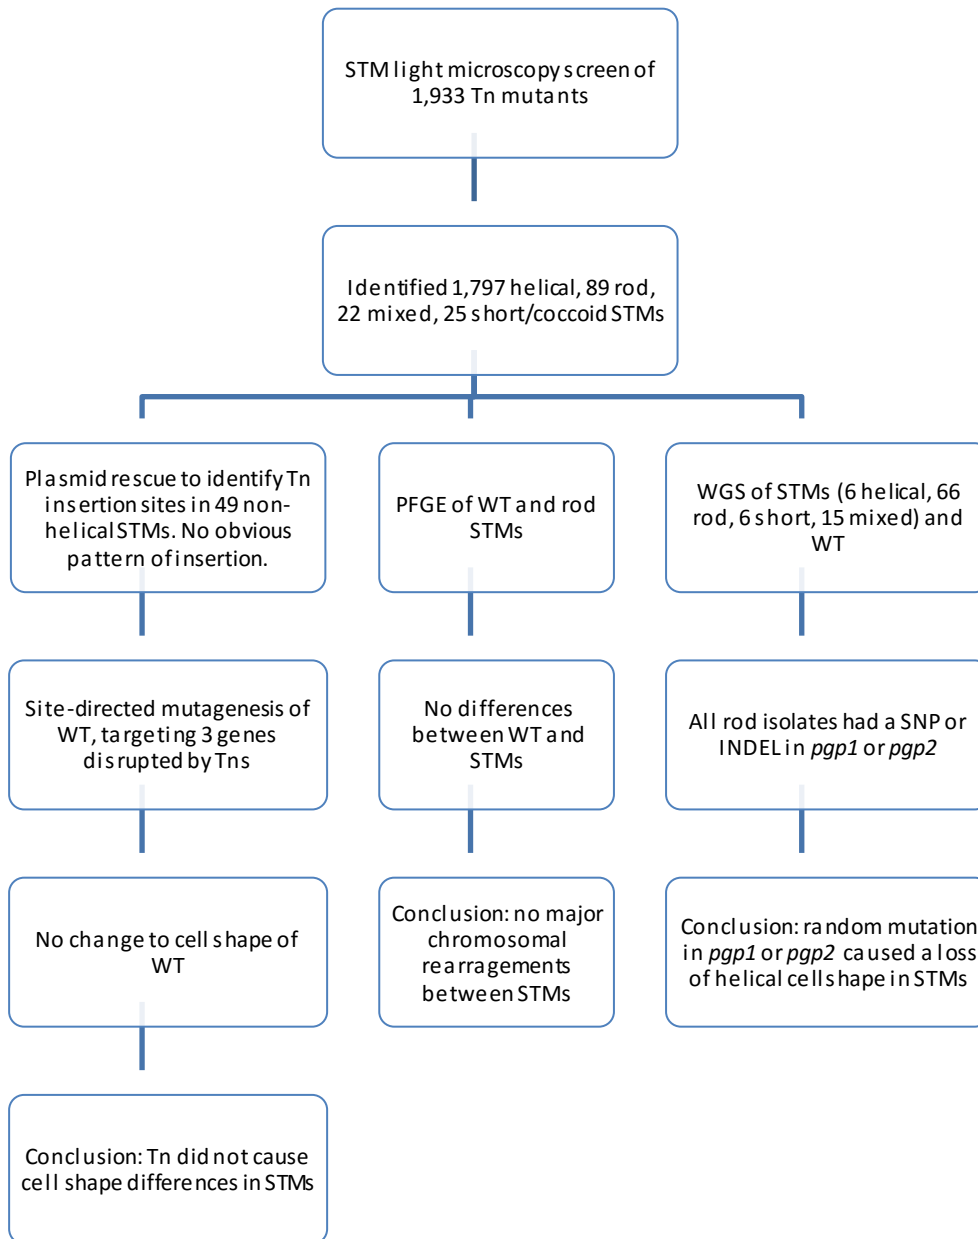

43

44 **Figure S2** Flow chart detailing the methods applied and conclusions made in the  
 45 process of the STM analysis.

46

47

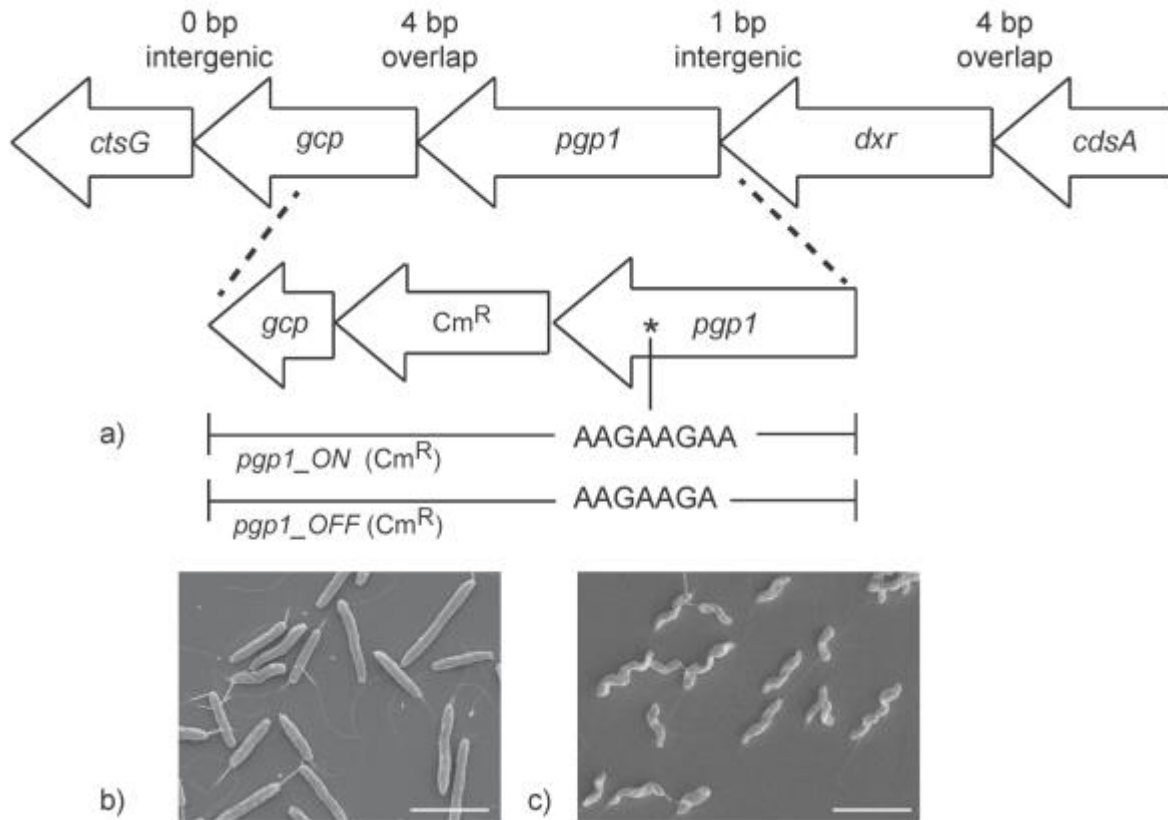

48

49 **Figure S3** Gene locus and site-directed mutant of *pgp1* in *C. jejuni* M1. (a) The *pgp1*  
50 'locked on' construct exchanged two adenines within the 8-A tract of AT PPVR3 with  
51 two guanines, this protected the tract from slipped-strand mispairing but the 'locked  
52 on' mutation maintained the same amino acid translation. A *cat* cassette (Cm<sup>R</sup>) was  
53 incorporated downstream of *pgp1*. The locked 'on' mutation, *cat* cassette and the  
54 flanking regions indicated (*pgp1\_ON*) were assembled by overlapping PCR and  
55 Gibson Assembly<sup>®</sup>. 'Locked on' constructs were cloned into the suicide vector pMiniT  
56 by PCR Cloning (pDARE7), and transformed into (b) rod WT *C. jejuni* M1 to generate  
57 (c) the helical *pgp1\_ON* strain. Scale bars represent ~2 μm.

58

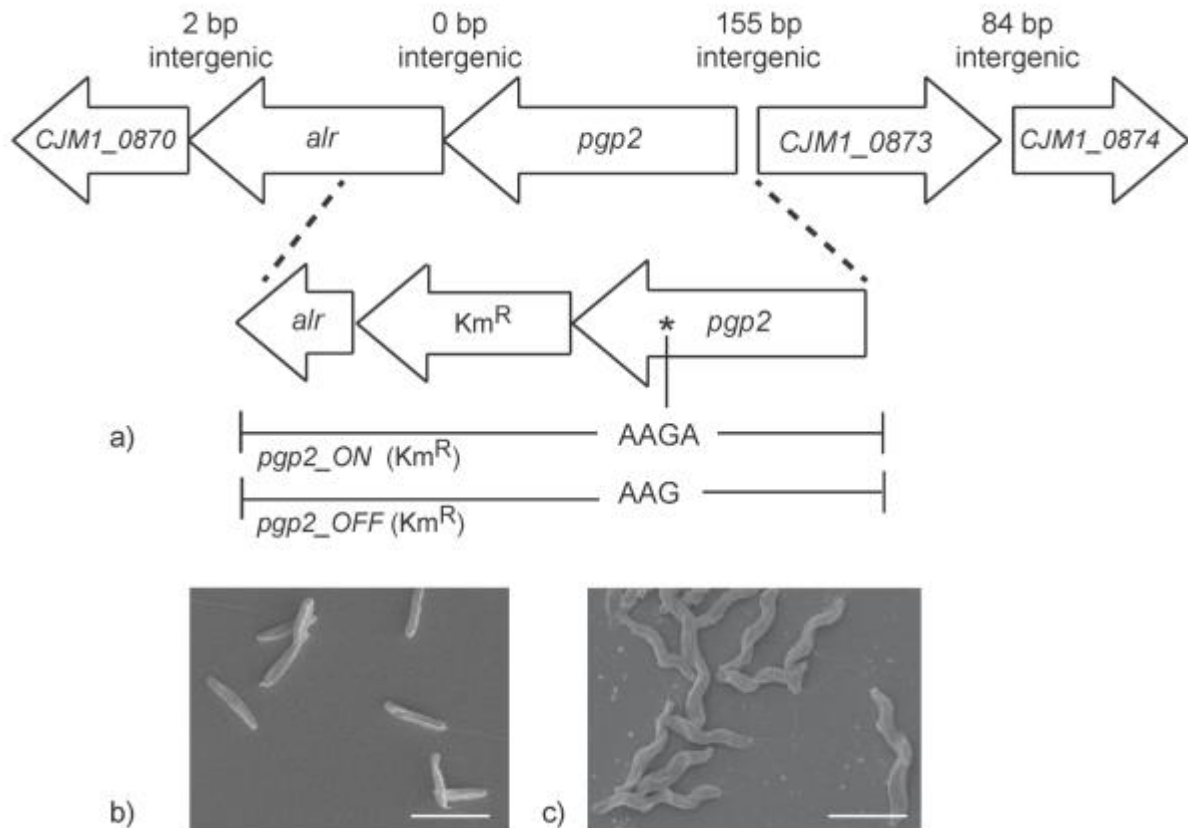

60

61 **Figure S4** Gene locus and site-directed mutant of *pgp2* in *C. jejuni* M1. (a) The *pgp2*  
 62 'locked on' construct exchanged one adenine within the 4-A tract at base location  
 63 846256 (CP001900.1) with guanine, this protected the tract from slipped-strand  
 64 mispairing but the 'locked on' mutation maintained the same amino acid translation. A  
 65 *cat* cassette (Cm<sup>R</sup>) was incorporated downstream of *pgp2*. The locked 'on' mutation,  
 66 *cat* cassette and the flanking regions indicated (*pgp2\_ON*) were assembled by  
 67 overlapping PCR and Gibson Assembly<sup>®</sup>. The linear *pgp2\_ON* construct was  
 68 transformed into (b) rod STM 50-18 to generate (c) a helical *pgp2\_ON* strain. Scale  
 69 bars represent ~2 μm.

70

71

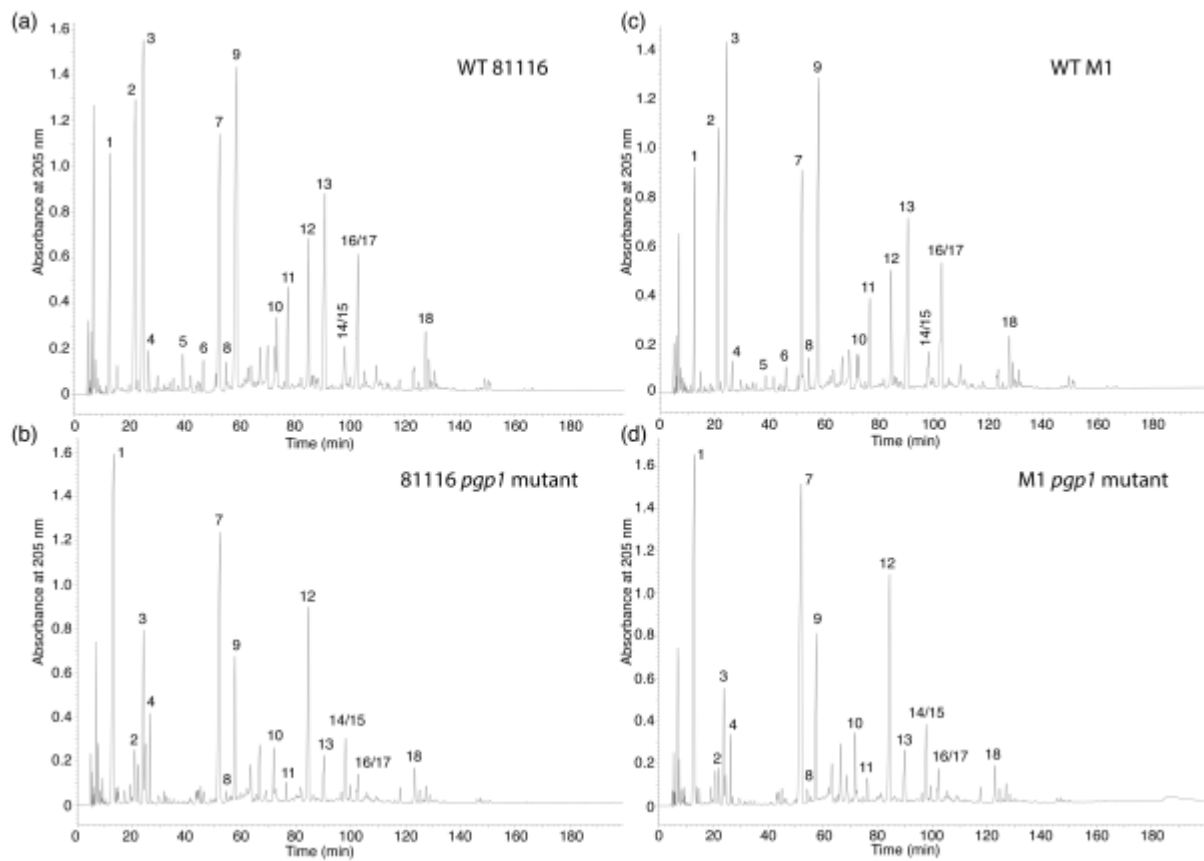

72

73 **Figure S5** Muropeptide profiles of helical and rod *C. jejuni* 81116 and M1 isolates.

74 HPLC chromatographs of purified PG from (a) WT helical isolate 81116, (b) WT rod

75 isolate 81116\_R1 (9A *pgp1* mutant), (c) WT helical isolate M1, and (d) rod isolate M1

76 STM 43-4\_R (INDEL in *pgp1* at base location 1268425). The WT helical isolates (a)

77 and (c) show similar muropeptide profiles. The rod isolates (b) and (d) contain unique

78 mutations in *pgp1* but demonstrate similar muropeptide profiles that sharply contrast

79 with the WT helical profiles. Patterns of peptide length and crosslinking are inferred by

80 the relative absorbance of muropeptide fractions (peaks). Muropeptide peaks have

81 been putatively numbered and identified according to published muropeptide profiles

82 of strain 81-176 (S1).

83

84

|                      | Organism         | Gene or phenotype           | Frequency            |                      | Rate                  |                      | Reference |
|----------------------|------------------|-----------------------------|----------------------|----------------------|-----------------------|----------------------|-----------|
|                      |                  |                             | Max                  | Min                  | Max                   | Min                  |           |
| Spontaneous mutation | <i>E. coli</i>   | <i>lacI</i>                 | $2.4 \times 10^{-6}$ |                      | $4.5 \times 10^{-7}$  |                      | (S2)      |
|                      |                  | Rifampicin <sup>a</sup>     | $4.0 \times 10^{-6}$ | $8.0 \times 10^{-6}$ |                       |                      | (S3)      |
|                      | <i>H. pylori</i> | Rifampicin <sup>a</sup>     | $3.0 \times 10^{-7}$ | $4.0 \times 10^{-6}$ |                       |                      | (S4)      |
|                      |                  | Clarithromycin <sup>a</sup> | $1.0 \times 10^{-7}$ | $5.0 \times 10^{-9}$ |                       |                      |           |
|                      |                  | Rifampicin <sup>a</sup>     | $6.6 \times 10^{-6}$ | $3.8 \times 10^{-6}$ | $1.6 \times 10^{-6}$  | $1.1 \times 10^{-6}$ | (S5)      |
|                      | <i>C. jejuni</i> | Clarithromycin <sup>a</sup> | $3.0 \times 10^{-9}$ |                      | $8.0 \times 10^{-10}$ |                      |           |
|                      |                  | Nalidixic acid <sup>a</sup> | $4.0 \times 10^{-6}$ | $1.0 \times 10^{-6}$ |                       |                      | (S6)      |
|                      |                  | Ciprofloxacin <sup>a</sup>  | $2.6 \times 10^{-6}$ | $4.2 \times 10^{-9}$ |                       |                      | (S7)      |
|                      |                  |                             | <b>On-to-Off</b>     | <b>Off-to-On</b>     | <b>On-to-Off</b>      | <b>Off-to-On</b>     |           |
| Phase variation      | <i>E. coli</i>   | <i>ag43</i>                 | $5.0 \times 10^{-7}$ |                      | $5.0 \times 10^{-7}$  |                      | (S8)      |
|                      | <i>C. jejuni</i> | <i>cj1139-lacZ-cat</i>      | $5.3 \times 10^{-2}$ | $5.2 \times 10^{-3}$ | $4.4 \times 10^{-3}$  | $5.8 \times 10^{-4}$ | (S9)      |
|                      |                  | <i>cj1139-lacZ-kan</i>      | $1.0 \times 10^{-2}$ | $6.5 \times 10^{-4}$ | $1.0 \times 10^{-3}$  | $1.0 \times 10^{-4}$ |           |
|                      |                  | <i>cj0031</i>               | $1.3 \times 10^{-2}$ | $1.7 \times 10^{-2}$ | $1.2 \times 10^{-3}$  | $1.8 \times 10^{-3}$ |           |
|                      |                  | <i>capA</i>                 | $1.8 \times 10^{-2}$ | $3.6 \times 10^{-2}$ | $1.6 \times 10^{-3}$  | $3.4 \times 10^{-3}$ |           |
|                      | <i>C. jejuni</i> | Helical-rod                 | $7.7 \times 10^{-9}$ |                      | $7.25 \times 10^{-9}$ |                      | This work |
| <i>C. jejuni</i>     | Helical-rod      | $2.1 \times 10^{-4}$        |                      |                      |                       | This work            |           |

85

86 **Table S1** Frequency and rate of morphological change in *C. jejuni* compared to  
87 spontaneous mutation and phase variation. The gene or phenotype used to measure  
88 mutation in various studies is displayed next to known mutation frequency and/or  
89 mutation rate values. Mutation rates are in mutations per division.

90





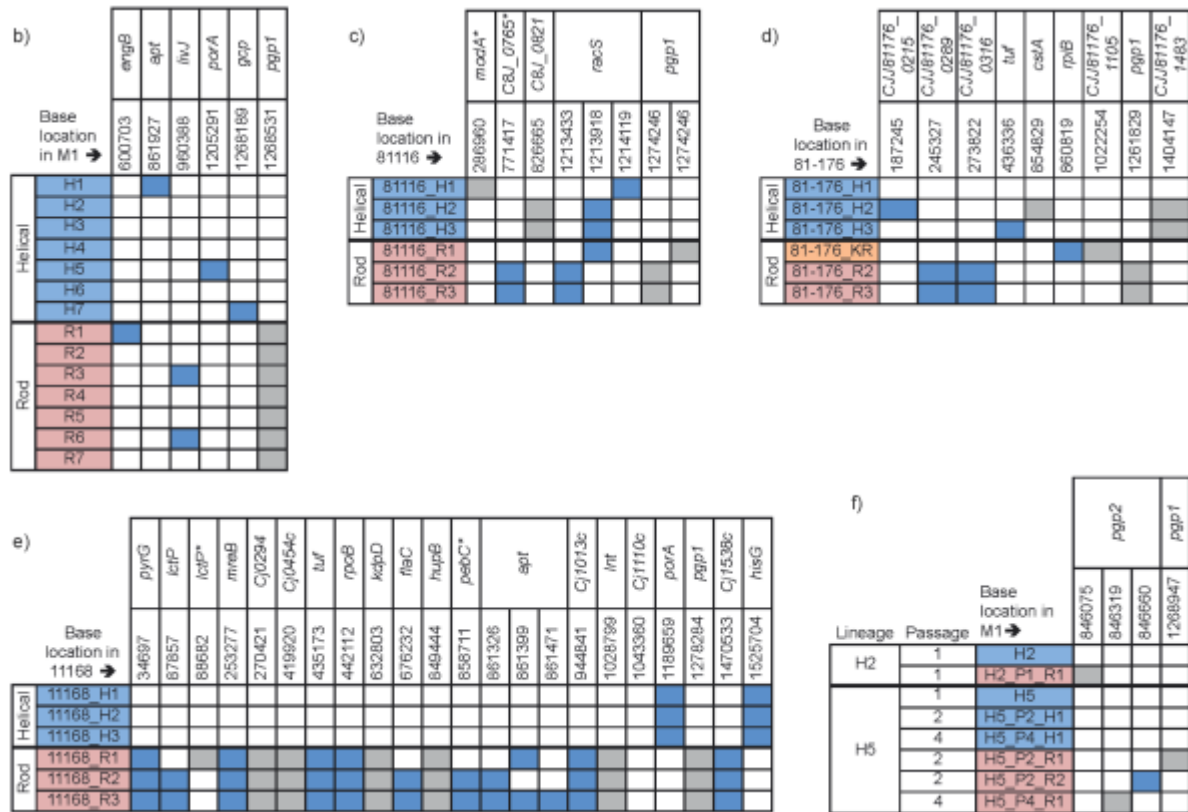

92

93 **Table S2** SNPs and INDELs detected by genome sequencing in *C. jejuni* strains.

94 SNPs (blue boxes) and INDELs (grey boxes) are organised by gene and base

95 locations within the *C. jejuni* M1 (CP0019001), 81116 (CP000814), 81-176

96 (CP000538.1), or NCTC11168 (AL111168.1) genomes. Solid fill indicates > 90% of

97 next generation sequencing (NGS) reads contain the variation; striped fill indicates 10-

98 90% of NGS reads contain the variation. Genes with a mutation located upstream of

99 the coding region are represented by an asterisk (\*). *C. jejuni* isolates are organized

100 and colour-coded by morphology: helical (blue), rod (red), rod-and-helical (purple),

101 short helical (yellow) and kinked rod (orange). (a) SNPs and INDELs present in *C.*

102 *jejuni* M1 Tn mutants and targeted deletion strains  $\Delta$ *CJM1\_0159::cat\_H* ( $\Delta$ 0159\_

103 *R*) that are not present in the WT *C. jejuni* M1

104 isolate (with the exception of the partial INDEL in *pgp1*). SNPs and INDELs present in

105 helical, rod and kinked rod WT *C. jejuni* isolates from strains (b) M1, (c) 81116, (d) 81-

106 176 and (e) NCTC11168. (f) SNPs and INDELs present in *C. jejuni* M1 helical-to-rod

107 passage mutants. Rod mutants are from the original helical isolates H2 and H5 after  
108 1, 2 or 4 passages. Helical isolates from each passage are also shown. All rod isolates  
109 contain a SNP or INDEL in *pgp1* or *pgp2*.

110

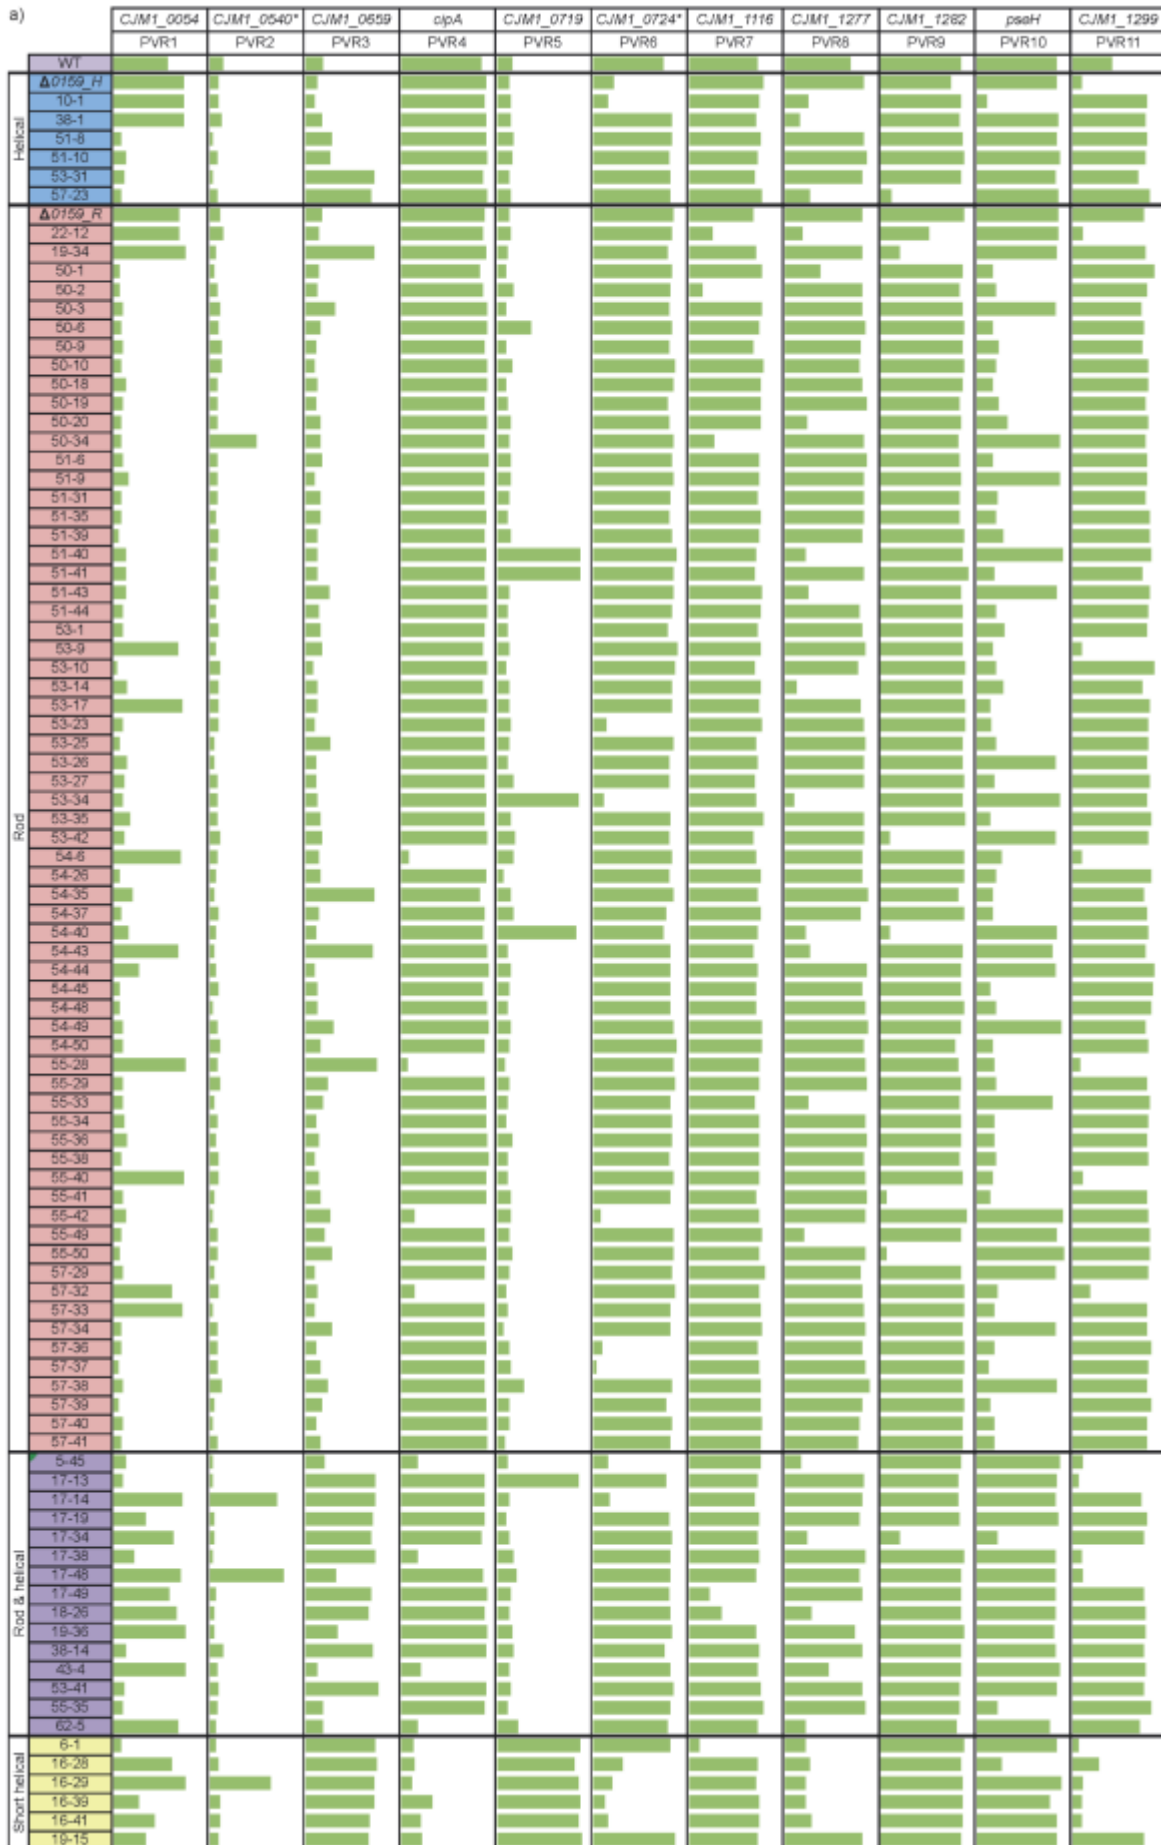

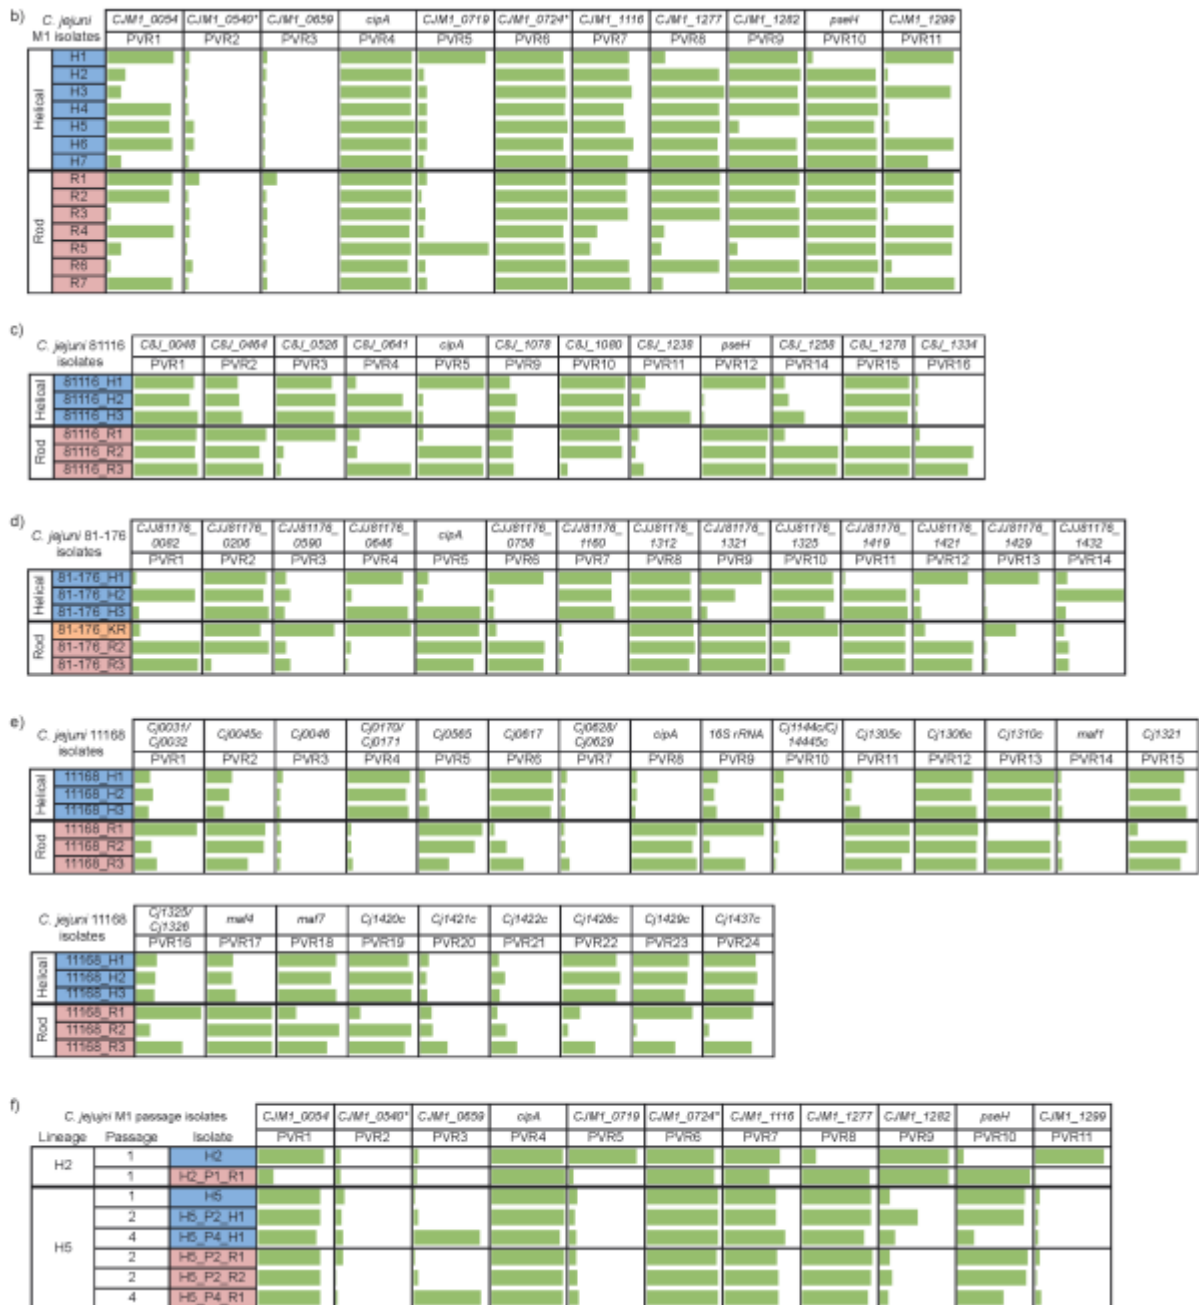

112

113

114 **Table S3** Percentage of genome sequence reads demonstrating 'on' tract lengths of

115 PVRs. PVRs are defined as G:C homopolymeric tracts seven or more bases in length.

116 PVRs are organised by gene location and genes with PVRs located upstream are

117 indicated with an asterisk (\*). *C. jejuni* isolates are organised and colour-coded by

118 morphology: helical (blue), rod (red), rod-and-helical (purple), short helical (yellow)

119 and kinked rod (orange). A PVR is considered 'on' if its tract length is in-frame with the

120 rest of the translated sequence, producing the full-length protein. Percentage of 'on'  
121 tract lengths are proportionate to the length of the green bars (column width represents  
122 100%). Percentage of 'off' tract lengths at each PVR may be inferred by the remaining  
123 column width not filled with green. (a) PVRs of *C. jejuni* M1 STMs and targeted deletion  
124 strains  $\Delta CJM1\_0159::cat\_H$  ( $\Delta 0159\_H$ ) and  $\Delta CJM1\_0159::cat\_R$  ( $\Delta 0159\_R$ ). PVRs  
125 of helical, rod and kinked rod WT *C. jejuni* isolates from strains (b) M1, (c) 81116, (d)  
126 81-176 and (e) NCTC11168. (f) PVRs of *C. jejuni* M1 helical-to-rod passage strains.  
127 Rod strains are from the original helical isolates H2 and H5 after 1, 2 or 4 passages.  
128 Helical isolates from each passage are also shown.

| Peak no. | Muropeptide fraction | Peak no. | Muropeptide fraction        |
|----------|----------------------|----------|-----------------------------|
| 1        | Tri<br>              | 11       | Tetra-Tetra-Tri<br>         |
| 2        | Tetra<br>            | 12       | Tetra-Tetra-Ac<br>          |
| 3        | Di<br>               | 13       | Tetra-Tetra-Tetra<br>       |
| 4        | Tri-Ac<br>           | 14       | Tetra-Tri-Anh I<br>         |
| 5        | Tetra-Ac<br>         | 15       | Tetra-Tri-Anh II<br>        |
| 6        | Di-Ac<br>            | 16       | Tetra-Tetra-Anh I<br>       |
| 7        | Tetra-Tri<br>        | 17       | Tetra-Tetra-Anh II<br>      |
| 8        | Penta-Gly<br>        | 18       | Tetra-Tetra-Tetra-Anh I<br> |
| 9        | Tetra-tetra<br>      |          |                             |
| 10       | Tetra-Tri-Ac<br>     |          |                             |

130

131 **Table S4** Muropeptide fractions of HPLC peaks. Lengths of each peptide monomer  
 132 (di-, tri-, tetra- or pentapeptide) are represented with circles. Crosslinked peptides in  
 133 the dimers and trimers (peaks 7, 9 and 10-18) are joined by dashes. The glycan  
 134 backbone residues, *N*-acetylmuramic acid (M) and *N*-acetylglucosamine (G), may be  
 135 acetylated (Ac) or anhydrous (Anh) as indicated. Table adapted from Firdich *et al*  
 136 (S1).

137

| Strain or plasmid           | Relevant genotype or description                                                                                                                                                                                                                                     | Source and/or reference    |
|-----------------------------|----------------------------------------------------------------------------------------------------------------------------------------------------------------------------------------------------------------------------------------------------------------------|----------------------------|
| <i>C. jejuni</i> M1         | Chicken and human clinical isolate (Helical)                                                                                                                                                                                                                         | Diane Newell, (S10)        |
| <i>C. jejuni</i> M1cam      | Derivative of original M1 isolate (Helical)                                                                                                                                                                                                                          | (S11)                      |
| <i>C. jejuni</i> 81-176     | Human clinical isolate, hyperinvasive (Helical)                                                                                                                                                                                                                      | (S12)                      |
| <i>C. jejuni</i> 81116      | Human clinical isolate (Helical)                                                                                                                                                                                                                                     | (S13)                      |
| <i>C. jejuni</i> NCTC11168  | Human clinical isolate (Helical)                                                                                                                                                                                                                                     | (S14)                      |
| $\Delta$ CJM1_0159_H        | M1 background, $\Delta$ CJM1_0159, Cm <sup>R</sup> (Helical)                                                                                                                                                                                                         | This study                 |
| $\Delta$ CJM1_0159_R        | M1 background, $\Delta$ CJM1_0159, Cm <sup>R</sup> (Rod)                                                                                                                                                                                                             | This study                 |
| $\Delta$ CJM1_0631          | M1 background, $\Delta$ CJM1_0631, Cm <sup>R</sup> (Helical and rod)                                                                                                                                                                                                 | This study                 |
| $\Delta$ dtpT               | M1 background, $\Delta$ dtpT, Cm <sup>R</sup> (Helical and rod)                                                                                                                                                                                                      | This study                 |
| pgp1_ON                     | Rod M1 background, pgp1_ON, Cm <sup>R</sup> (Helical)                                                                                                                                                                                                                | This study                 |
| pgp2_ON                     | Helical M1 background, pgp2_ON, Cm <sup>R</sup> (Helical)                                                                                                                                                                                                            | This study                 |
| 22-12_pgp2_ON               | Rod M1 STM 22-12 background, pgp2_ON, Cm <sup>R</sup> , Km <sup>R</sup> (Helical)                                                                                                                                                                                    | This study                 |
| 50-18_pgp2_ON               | Rod M1 STM 50-18 background, pgp2_ON, Cm <sup>R</sup> , Km <sup>R</sup> (Helical)                                                                                                                                                                                    | This study                 |
| 51-44_pgp2_ON               | Rod M1 STM 51-44 background+, pgp2_ON, Cm <sup>R</sup> , Km <sup>R</sup> (Helical)                                                                                                                                                                                   | This study                 |
| <i>E. coli</i> DH5 $\alpha$ | Subcloning Efficiency™ DH5 $\alpha$ ™ Competent Cells. F <sup>-</sup> $\Phi$ 80/lacZ $\Delta$ M15 $\Delta$ (lacZYA-argF) U169<br><i>recA1 endA1 hsdR17(r<sub>K</sub><sup>-</sup>, m<sub>K</sub><sup>+</sup>) phoA supE44 thi-1 gyrA96 relA1 <math>\lambda</math></i> | Thermo Scientific          |
| <b>Plasmids</b>             |                                                                                                                                                                                                                                                                      |                            |
| pUC19                       | <i>E. coli</i> cloning vector, <i>C. jejuni</i> suicide vector, Ap <sup>R</sup>                                                                                                                                                                                      | New England Biolabs, (S15) |
| pCE107/70                   | <i>C. jejuni</i> shuttle vector, Km <sup>R</sup>                                                                                                                                                                                                                     | (S16)                      |
| pRY111                      | Source of <i>Campylobacter cat</i> cassette, Cm <sup>R</sup>                                                                                                                                                                                                         | (S17)                      |
| pMini1                      | <i>E. coli</i> cloning vector, <i>C. jejuni</i> suicide vector, Ap <sup>R</sup>                                                                                                                                                                                      | New England Biolabs        |
| pDARE1                      | pUC19 derivative encoding $\Delta$ CJM1_0159, Ap <sup>R</sup> , Cm <sup>R</sup>                                                                                                                                                                                      | This study                 |
| pDARE2                      | pCE107/70 derivative encoding CJM1_0159, Km <sup>R</sup>                                                                                                                                                                                                             | This study                 |
| pDARE3                      | pUC19 derivative encoding $\Delta$ CJM1_0631, Ap <sup>R</sup> , Cm <sup>R</sup>                                                                                                                                                                                      | This study                 |
| pDARE4                      | pCE107/70 derivative encoding CJM1_0631, Km <sup>R</sup>                                                                                                                                                                                                             | This study                 |
| pDARE5                      | pUC19 derivative encoding $\Delta$ dtpT, Ap <sup>R</sup> , Cm <sup>R</sup>                                                                                                                                                                                           | This study                 |
| pDARE6                      | pCE107/70 derivative encoding dtpT, Ap <sup>R</sup> , Cm <sup>R</sup>                                                                                                                                                                                                | This study                 |
| pDARE7                      | pMiniT derivative encoding pgp1_ON, Ap <sup>R</sup> , Km <sup>R</sup>                                                                                                                                                                                                | This study                 |
| pDARE8                      | pMiniT derivative encoding pgp1_OFF, Ap <sup>R</sup> , Cm <sup>R</sup>                                                                                                                                                                                               | This study                 |
| pDARE9                      | pMiniT derivative encoding pgp2_OFF, Ap <sup>R</sup> , Cm <sup>R</sup>                                                                                                                                                                                               | This study                 |



140 **Table S5** Bacterial strains and plasmids used in this study. Abbreviations for  
141 antibiotics: Cm, Chloramphenicol; Km, Kanamycin; Ap, Ampicillin.

| Primer   | Target                      | Sequence (5' – 3')                                |
|----------|-----------------------------|---------------------------------------------------|
| dare008  | <i>cat</i> cassette         | gaattc <u>gg</u> taccCTCGGCGGTGTCCTTCCAAGT        |
| dare009  | <i>cat</i> cassette         | gcatgc <u>gg</u> atccCGCCCTTAGTTCCTAAAGGGT        |
| dare010  | <i>cat</i> cassette         | gcatgc <u>ctg</u> cagCGCCCTTAGTTCCTAAAGGGT        |
| dare011  | <i>cat</i> cassette         | agtact <u>gag</u> ctcCTCGGCGGTGTCCTTCCAAGT        |
| 0159_1   | <i>CJM1_0159</i> upstream   | ggatcc <u>gag</u> ctcATGCAAAAAGCTAAAAATTTAATGCG   |
| 0159_2   | <i>CJM1_0159</i> upstream   | aagctt <u>gg</u> taccTTTTATAAATATCTTTTCATAAAAAGGC |
| 0159_3   | <i>CJM1_0159</i> downstream | ccggg <u>gg</u> atccCTTTTCATAAATAATCTTTTATG       |
| 0159_4   | <i>CJM1_0159</i> downstream | ctcgag <u>gcat</u> gcCTAATCTTGACTTAAAGCAGTTTTG    |
| 0159_ck1 | $\Delta$ <i>CJM1_0159</i>   | AAGAACAGGCTATGCACAAGG                             |
| 0159_ck2 | $\Delta$ <i>CJM1_0159</i>   | ACCTGATTTGCGATTTGG                                |
| 0159_ck3 | $\Delta$ <i>CJM1_0159</i>   | GTTTTAATGGCCGTGCTGTT                              |
| 0159_ck4 | $\Delta$ <i>CJM1_0159</i>   | AAGCCTTGCCAGGATCACTA                              |
| 0159_ck5 | $\Delta$ <i>CJM1_0159</i>   | TGCAAAATGCAGCCTTAGTTG                             |
| 0631_1   | <i>CJM1_0631</i> upstream   | ggatcc <u>gag</u> ctcATGAATAAAATAGAAGTATTTTGCA    |
| 0631_2   | <i>CJM1_0631</i> upstream   | aagctt <u>gg</u> taccTCCCAATACCTTTCTTTTATGCTTA    |
| 0631_3   | <i>CJM1_0631</i> downstream | ccggg <u>gg</u> atccACTTAAATACAAAATACACCAAAG      |
| 0631_4   | <i>CJM1_0631</i> downstream | ctcgag <u>gcat</u> gcCTACAAAAGCAGGAAAATTAAGC      |
| 0631_ck1 | $\Delta$ <i>CJM1_0631</i>   | TCATGGCTTAATCCAATGATTC                            |
| 0631_ck2 | $\Delta$ <i>CJM1_0631</i>   | CCAAAATGCCATCCGTATTC                              |
| 0631_ck3 | $\Delta$ <i>CJM1_0631</i>   | TAGTGGTCGAAATACTCTTTTCGTG                         |
| 0631_ck4 | $\Delta$ <i>CJM1_0631</i>   | CCCTTATCGATTCAGTGCATCATG                          |
| dtpT_1   | <i>dtpT</i> upstream        | ggatcc <u>gag</u> ctcACAAAGTTATACATAT             |
| dtpT_2   | <i>dtpT</i> upstream        | aagctt <u>gg</u> taccATAAAAAGAGTAAAACACAG         |
| dtpT_3   | <i>dtpT</i> downstream      | ccggg <u>ctg</u> cagTATTAAGGAGAAAATATGA           |
| dtpT_4   | <i>dtpT</i> downstream      | ctcgag <u>gcat</u> gcTCAAGCTCCATGATGATTC          |
| dtpT_ck1 | $\Delta$ <i>dtpT</i>        | TGCATGTGGATGCTTTTGT                               |
| dtpT_ck2 | $\Delta$ <i>dtpT</i>        | AAAGCGGTCATTTTAAGG                                |
| pgp1_1   | <i>pgp1</i> left flank      | ATGAAATTTTTTAAACAATTTTAT                          |
| pgp1_2   | <i>pgp1_ON</i> left flank   | TATTCTCTTATGAACATAAATACCCTTTCATC                  |
| pgp1_3   | <i>pgp1_OFF</i> left flank  | TATCTTCTTATGAACATAAATACCCTTTCATC                  |
| pgp1_4   | <i>pgp1_ON</i> right flank  | ATAAGAAGAAATATGCAACACAACTCTTTA                    |
| pgp1_5   | <i>pgp1_OFF</i> right flank | ATAAGAAGATAAGCAACACAACTCTTTA                      |
| pgp1_6   | <i>pgp1</i> right flank     | ATCAATCTTTGTAATGCATCAATCAAATCCACTAAAATAG          |
| pgp1_7   | <i>cat</i> cassette         | CTATTTTAGTGAATTGAATGATGCAATCACAAAGATTGAT          |

|          |                                    |                                                   |
|----------|------------------------------------|---------------------------------------------------|
| pgp1_8   | <i>cat</i> cassette                | CTAGGATAAGATTTTTCAATTTATTTATTCAGCAAGTCTTGT        |
| pgp1_9   | <i>pgp1</i> dow nstream            | ACAAGACTTGCTGAATAAATAAATGAAAAATCTTATCCTAG         |
| pgp1_10  | <i>pgp1</i> dow nstream            | CGCACTGCATTTTTAAGTCC                              |
| pgp1_ck1 | <i>pgp1_ON</i> and <i>pgp1_OFF</i> | TGCTGCTAATGAAGTTGGTGT                             |
| pgp1_ck2 | <i>pgp1_ON</i> and <i>pgp1_OFF</i> | CCGCCTACCAACGCCAAAATT                             |
| pgp1_ck3 | <i>pgp1_ON</i> and <i>pgp1_OFF</i> | GCAATGAAACCACCGTTCCT                              |
| pgp2_1   | <i>pgp2</i> left flank             | gagctc <u>ggtagc</u> TGCCAAAAAGACATTCCTATAAA      |
| pgp2_2   | <i>pgp2_ON</i> left flank          | CTGTTCAAATTCATCTTATCAAAAC                         |
| pgp2_3   | <i>pgp2_OFF</i> left flank         | CTGTTCAAATTCACTTATCAAAAC                          |
| pgp2_4   | <i>pgp2_ON</i> right flank         | AAACGTTTTGATAAAGATGAAAT                           |
| pgp2_5   | <i>pgp2_OFF</i> right flank        | AAACGTTTTGATAAGTAAAT                              |
| pgp2_6   | <i>pgp2</i> right flank            | GATATTCTCATTTAGCCATTTATTGCTCTGCTAAAAT             |
| pgp2_7   | Km <sup>R</sup> cassette           | ATTTTAGCAGAGCAATAAATGGCTAAAAATGAGAATATC           |
| pgp2_8   | Km <sup>R</sup> cassette           | GAATTTTATTAAAGACATTTATTGCTCTGCCTAAAACAATTCATCCAG  |
| pgp2_9   | <i>pgp2</i> dow nstream            | CTGGATGAATTGTTTTAGGCAGAGCAATAAATGCTTTTAATAAAAATTG |
| pgp2_10  | <i>pgp2</i> dow nstream            | gaattc <u>tctaga</u> GAATAAGATCTATAGCATGTTT       |
| pgp2_ck1 | <i>pgp2_ON</i> and <i>pgp2_OFF</i> | GGTTTTGGGTAGGCTGAAACT                             |
| pgp2_ck2 | <i>pgp2_ON</i> and <i>pgp2_OFF</i> | TCCATCCATTTTATCTGCACT                             |
| pgp2_ck3 | <i>pgp2_ON</i> and <i>pgp2_OFF</i> | ACATGGAACTAGCTTGGACA                              |
| AJG227   | Transposon                         | CCCGGGAATCATTGAAG                                 |
| CC1      | Transposon                         | TAACTTGGAAAGGAACACCG                              |
| 254      | Linker                             | CGACTGGACCTGGA                                    |
| 256      | Linker                             | GATAAGCAGGGATCGGAACCTCCAGGTCAGTCG                 |
| 258      | Linker                             | GATAAGCAGGGATCGGAACC                              |
| CAT15    | <i>Cat</i> cassette                | TAGTGGTCGAAATACTCTTTTCGTG                         |

143

144 **Table S6** Primer sequences used in this study. Upper-case indicates homology to  
 145 target sequence. Restriction enzyme sites are underlined and preceded by an arbitrary  
 146 6-bp sequence.

147

148 **Supplemental references**

- 149 S1. Fridrich, E. *et al.* Peptidoglycan-modifying enzyme Pgp1 is required for helical  
150 cell shape and pathogenicity traits in *Campylobacter jejuni*. PLoS. Pathog. **8**,  
151 e1002602 (2012).
- 152
- 153 S2. Drake, J.W., Charlesworth, B., Charlesworth, D., & Crow, J.F. Rates of  
154 spontaneous mutation. *Genetics*. **148**, 1667-1687 (1990).
- 155
- 156 S3. Baquero, M.R. *et al.* Polymorphic mutation frequencies in *Escherichia coli*:  
157 emergence of weak mutators in clinical isolates. *J. Bacteriol.* **186**, 5538-5542  
158 (2004).
- 159
- 160 S4. Bjorkholm, B., Sjolund, M., Falk, P.G., Berg, O.G., Engstrand, L., & Andersson,  
161 D.I. Mutation frequency and biological cost of antibiotic resistance in *Helicobacter*  
162 *pylori*. *Proc. Natl. Acad. Sci. USA.* **98**, 14607-14612 (2001).
- 163
- 164 S5. Wang, G., Wilson, T.J.M., Jiang, Q., & Taylor, D.E. 2001. Spontaneous  
165 mutations that confer antibiotic resistance in *Helicobacter pylori*. *Antimicrob.*  
166 *Agents. Chemother.* **45**, 727-733 (2001).
- 167
- 168 S6. Gaasbeek, E.J. *et al.* Functional characterization of excision repair and RecA-  
169 dependent recombinational DNA repair in *Campylobacter jejuni*. *J. Bacteriol.*  
170 **191**, 3785-3793 (2009).

171

- 172 S7. Hanninen, M.L., & Hannula, M. Spontaneous mutation frequency and  
173 emergence of ciprofloxacin resistance in *Campylobacter jejuni* and  
174 *Campylobacter coli*. *J. Antimicrob. Chemother.* **60**, 1251-1257 (2007).
- 175
- 176 S8. Chauhan, A., Sakamoto, C., Ghigo, J-M., & Beloin, C. Did I pick the right colony?  
177 Pitfalls in the study of the regulation of phase variable antigen 43 adhesin. *PLoS.*  
178 *One.* **8**, e73568 (2013).
- 179
- 180 S9. Bayliss, C.D., *et al.* Phase variable genes of *Campylobacter jejuni* exhibit high  
181 mutation rates and specific mutational patterns but mutability is not the major  
182 determinant of population structure during host colonization. *Nucleic. Acids. Res.*  
183 **40**, 5876-5889 (2012).
- 184
- 185 S10. Friis, C. *et al.* Genomic Characterization of *Campylobacter jejuni* Strain M1.  
186 *PLoS. One.* **5**, e12253 (2010).
- 187
- 188 S11. de Vries SP *et al.* Motility defects in *Campylobacter jejuni* defined gene deletion  
189 mutants caused by second-site mutations. *Microbiology.* **161**, 2316-2327 (2015).
- 190
- 191 S12. Korlath, J.A., Osterholm, M.T., Judy, L.A., Forfang, J.C., & Robinson, R.A. A  
192 point-source outbreak of Campylobacteriosis associated with consumption of  
193 raw milk. *J. Infect. Dis.* **152**, 592-596 (1985).
- 194

- 195 S13. Palmer, S.R. *et al.* Water-borne outbreak of *Campylobacter* gastroenteritis.  
196 *Lancet*. **1**, 287-290 (1983).
- 197
- 198 S14. Skirrow, M.B. *Campylobacter* enteritis: a “new” disease. *Br. Med. J.* **2**, 9-11  
199 (1977).
- 200
- 201 S15. Yanisch-Perron, C. Vieira, J. & Messing, J. Improved M13 phage cloning vectors  
202 and host strains: nucleotide sequences of the M13mpl8. *Gene*. **33**, 103-119  
203 (1985).
- 204
- 205 S16. Larsen, J.C., Szymanski, C., & Guerry, P. N-linked protein glycosylation is  
206 required for full competence in *Campylobacter jejuni* 81-176. *J. Bacteriol.* **186**,  
207 6508-6514 (2004).
- 208
- 209 S17. Yao, R., Alm, R.A., Trust, T.J., & Guerry, P. Construction of new *Campylobacter*  
210 cloning vectors and a new mutational cat cassette. *Gene*. **130**, 127-130 (1993).
